# Supplementary material for: Boranil dye based “turn-on” fluorescent probes for detection of hydrogen peroxide and their cell imaging application
Source: Royal Society of Chemistry journal article supplement (doi:10.1039/c6ra17863d), 2016-01-01
Supplement: c6ra17863d1.pdf [file c6ra17863d1.pdf]

## Supporting Information

### Boranil Dye Based “Turn-on” Fluorescent Probes for Detection of Hydrogen Peroxide and Their Cell Imaging Application

Jayabalan Shanmugapriya,<sup>a‡</sup> Kandasamy Rajaguru,<sup>b‡</sup> Gandhi Sivaraman,<sup>c‡</sup> Shanmugam Muthusubramanian,<sup>\*b</sup> and Nattamai Bhuvanesh<sup>d</sup>

<sup>a</sup> *Department of Chemistry, Thiagarajar College of Engineering, Madurai – 625 01, India*

<sup>b</sup> *Department of Organic Chemistry, School of Chemistry, Madurai Kamaraj University, Madurai - 625 021, India*

<sup>c</sup> *Institute for Stem Cell Biology and Regenerative Medicine, National Centre for Biological Sciences, Bangalore – 560065, India*

<sup>d</sup> *X-ray Diffraction Laboratory, Department of Chemistry, Texas A & M University, College Station, Texas, 77842, USA*

<sup>‡</sup> *These authors have contributed equally*

*\*e-mail: [muthumanian2001@yahoo.com](mailto:muthumanian2001@yahoo.com)*

| <b>Table of contents</b>                                                                                 | <b>Page No</b> |
|----------------------------------------------------------------------------------------------------------|----------------|
| $^1\text{H}$ , $^{13}\text{C}$ , $^{11}\text{B}$ and $^{19}\text{F}$ NMR spectra of compound <b>SB-1</b> | S3             |
| $^1\text{H}$ , $^{13}\text{C}$ , $^{11}\text{B}$ and $^{19}\text{F}$ NMR spectra of compound <b>SB-2</b> | S7             |
| Table S1                                                                                                 | S11            |
| Optimized geometries of <b>SB-1</b> and <b>SB-2</b>                                                      | S21            |
| Table S2                                                                                                 | S25            |

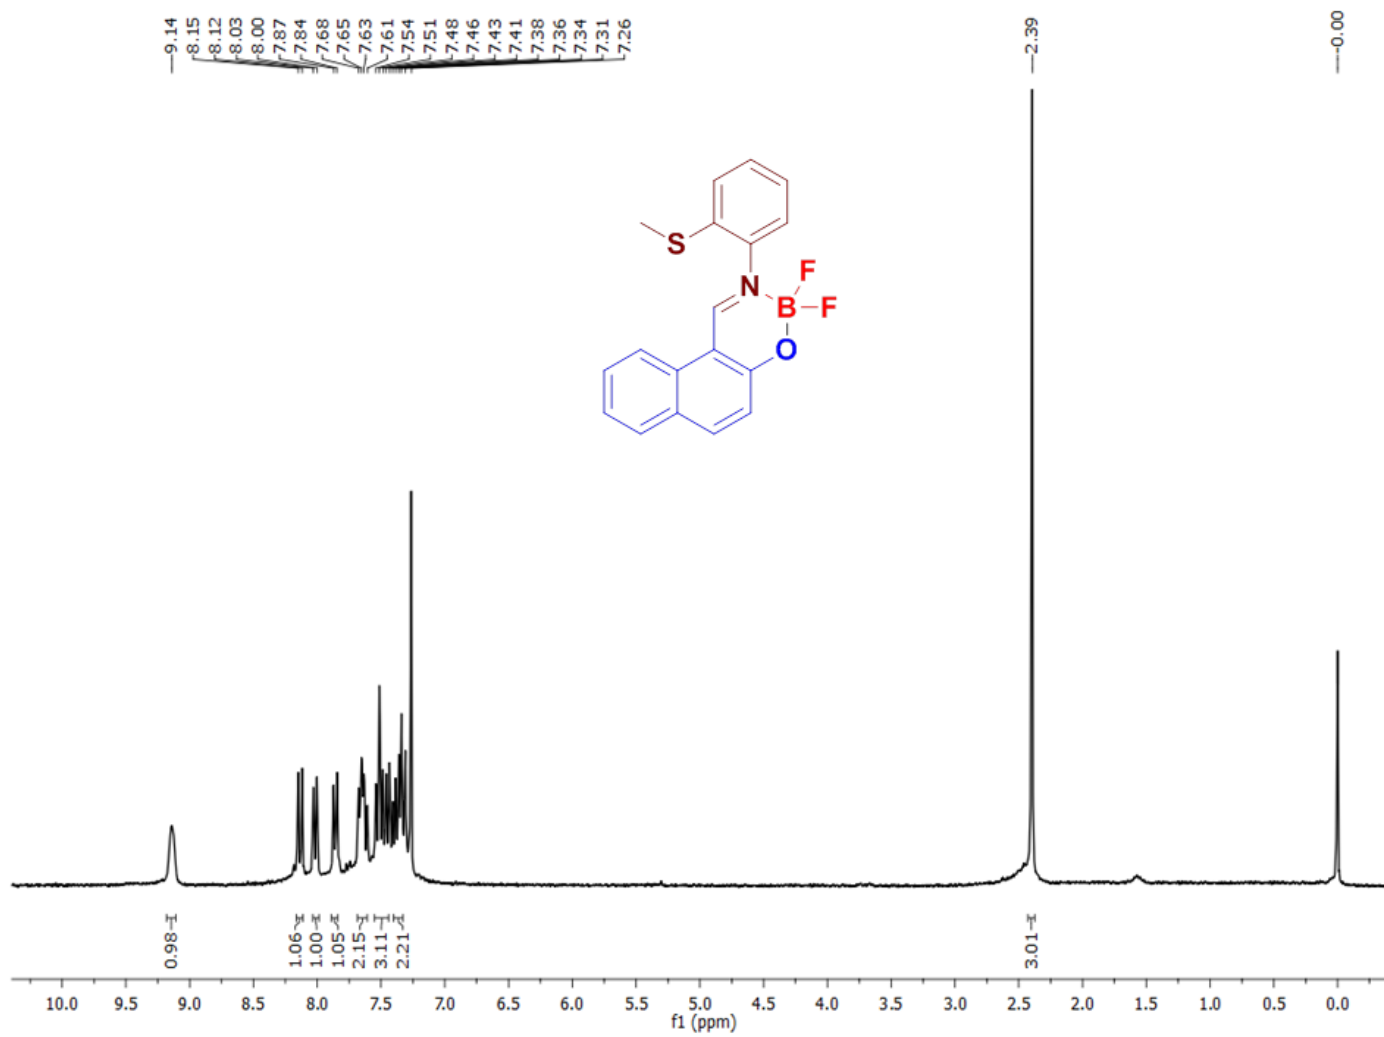

Figure S1. <sup>1</sup>H NMR spectrum of compound **SB-1**

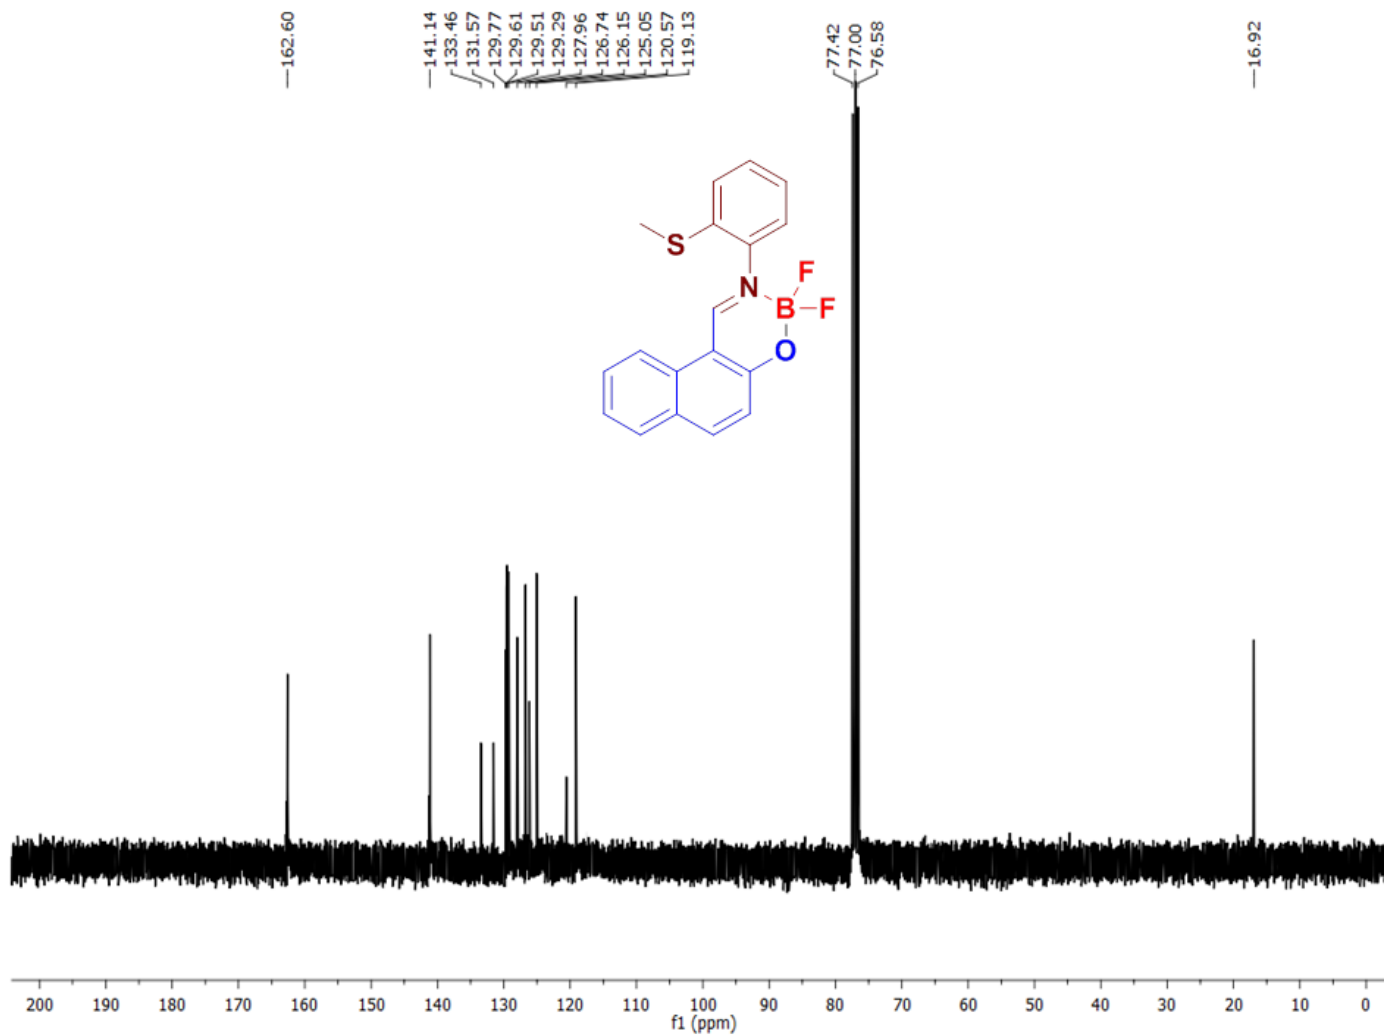

Figure S2.  $^{13}\text{C}$  NMR spectrum of compound SB-1

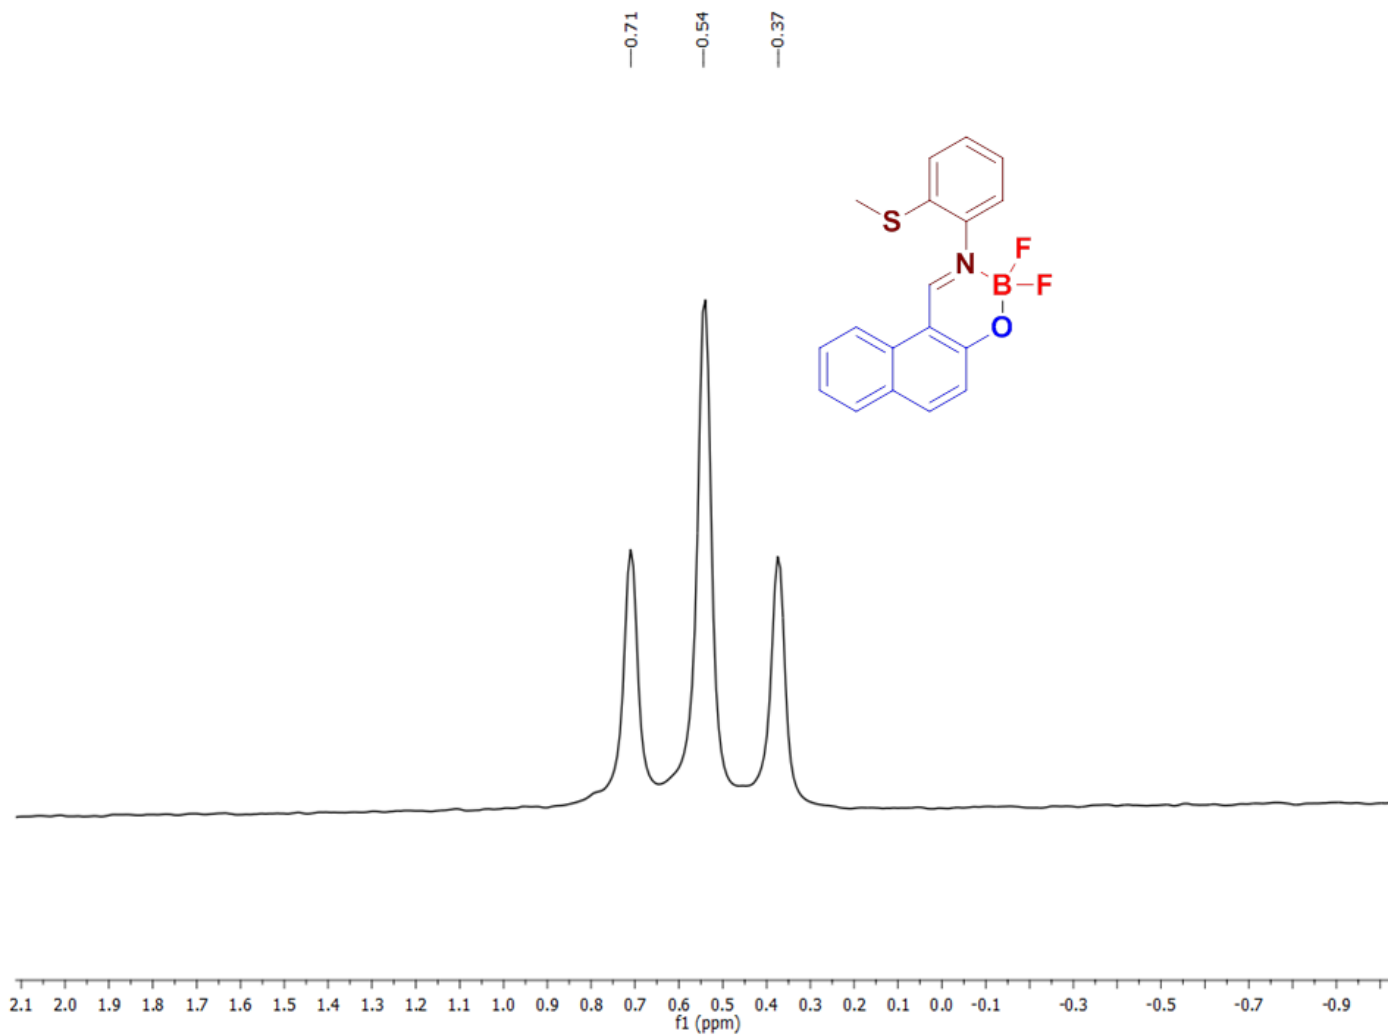

Figure S3.  $^{11}\text{B}$  NMR spectrum of compound **SB-1**

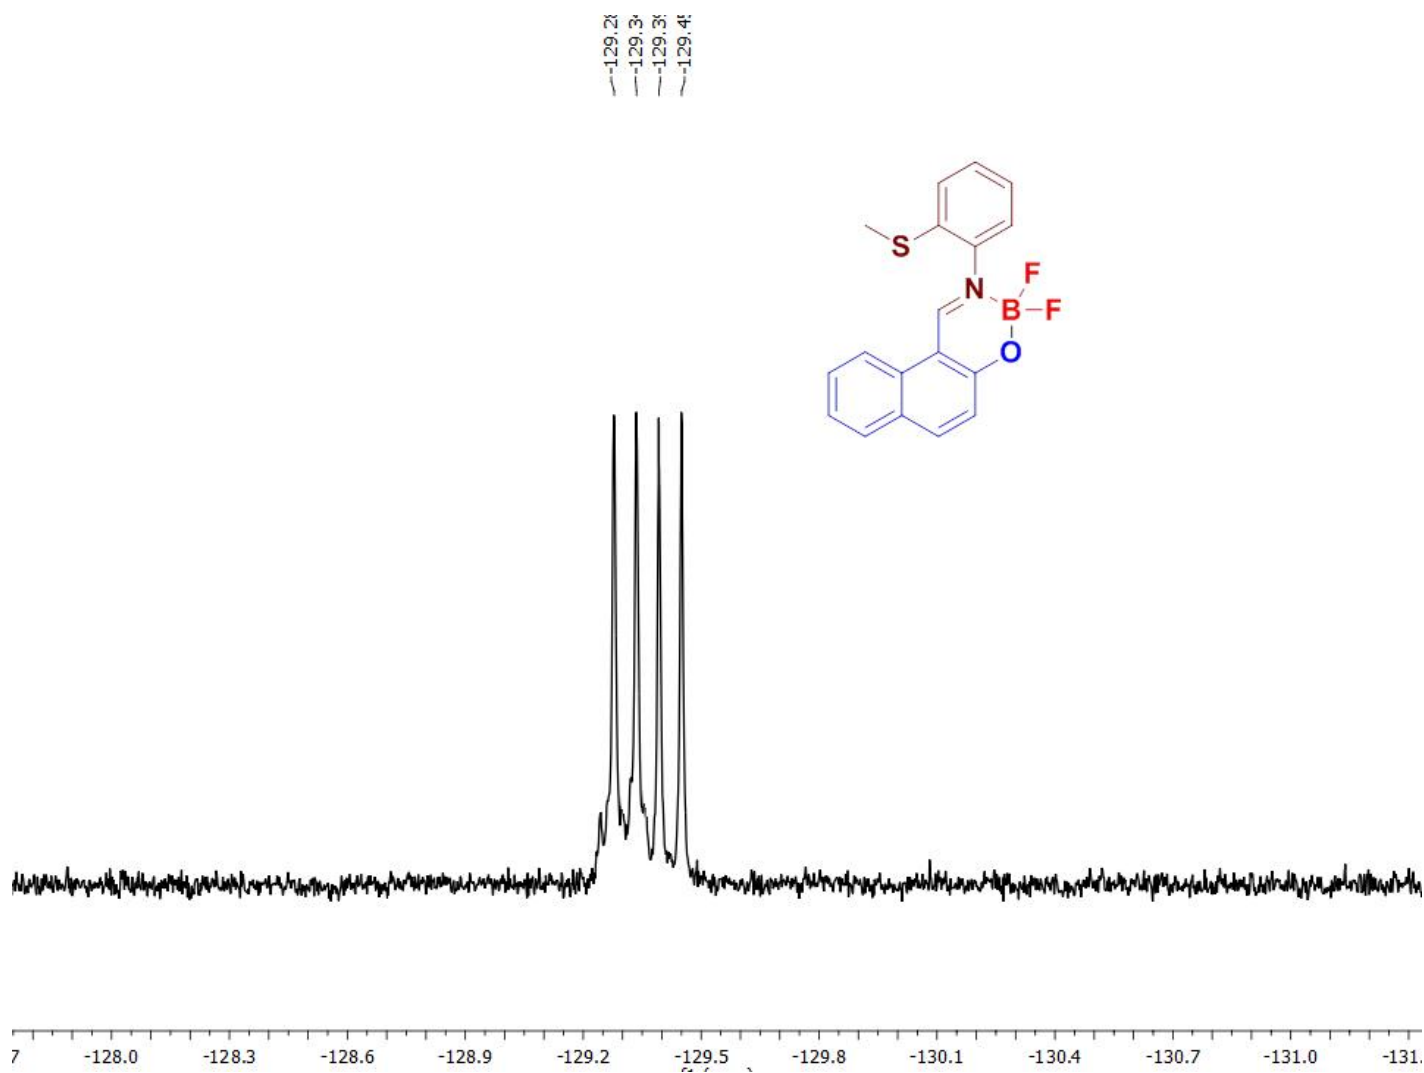

Figure S4.  $^{19}\text{F}$  NMR spectrum of compound **SB-1**

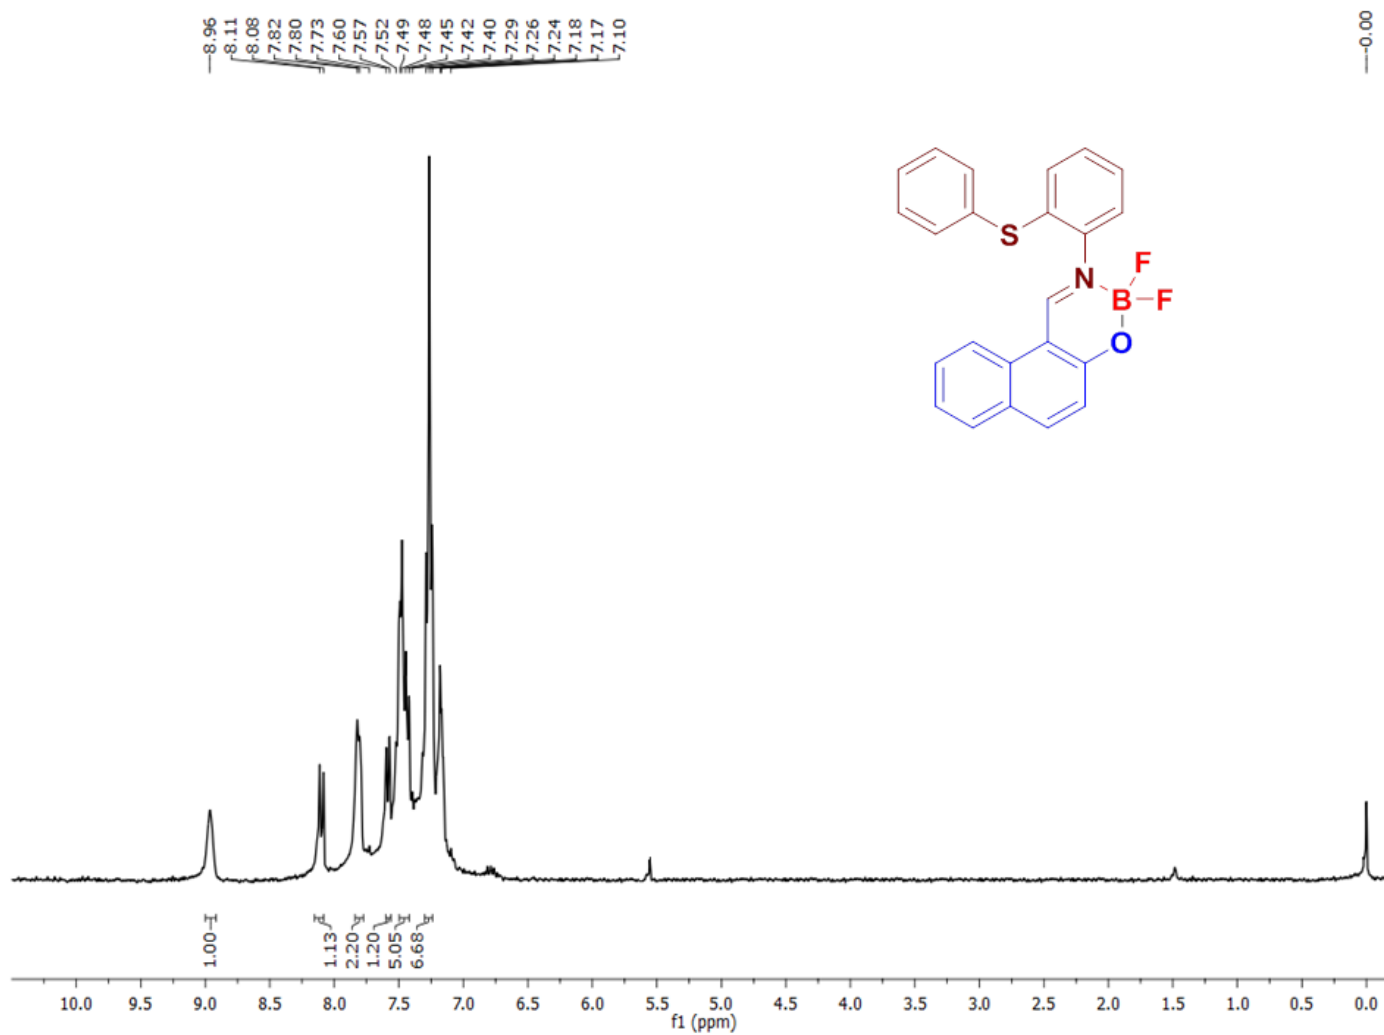

Figure S5. <sup>1</sup>H NMR spectrum of compound **SB-2**

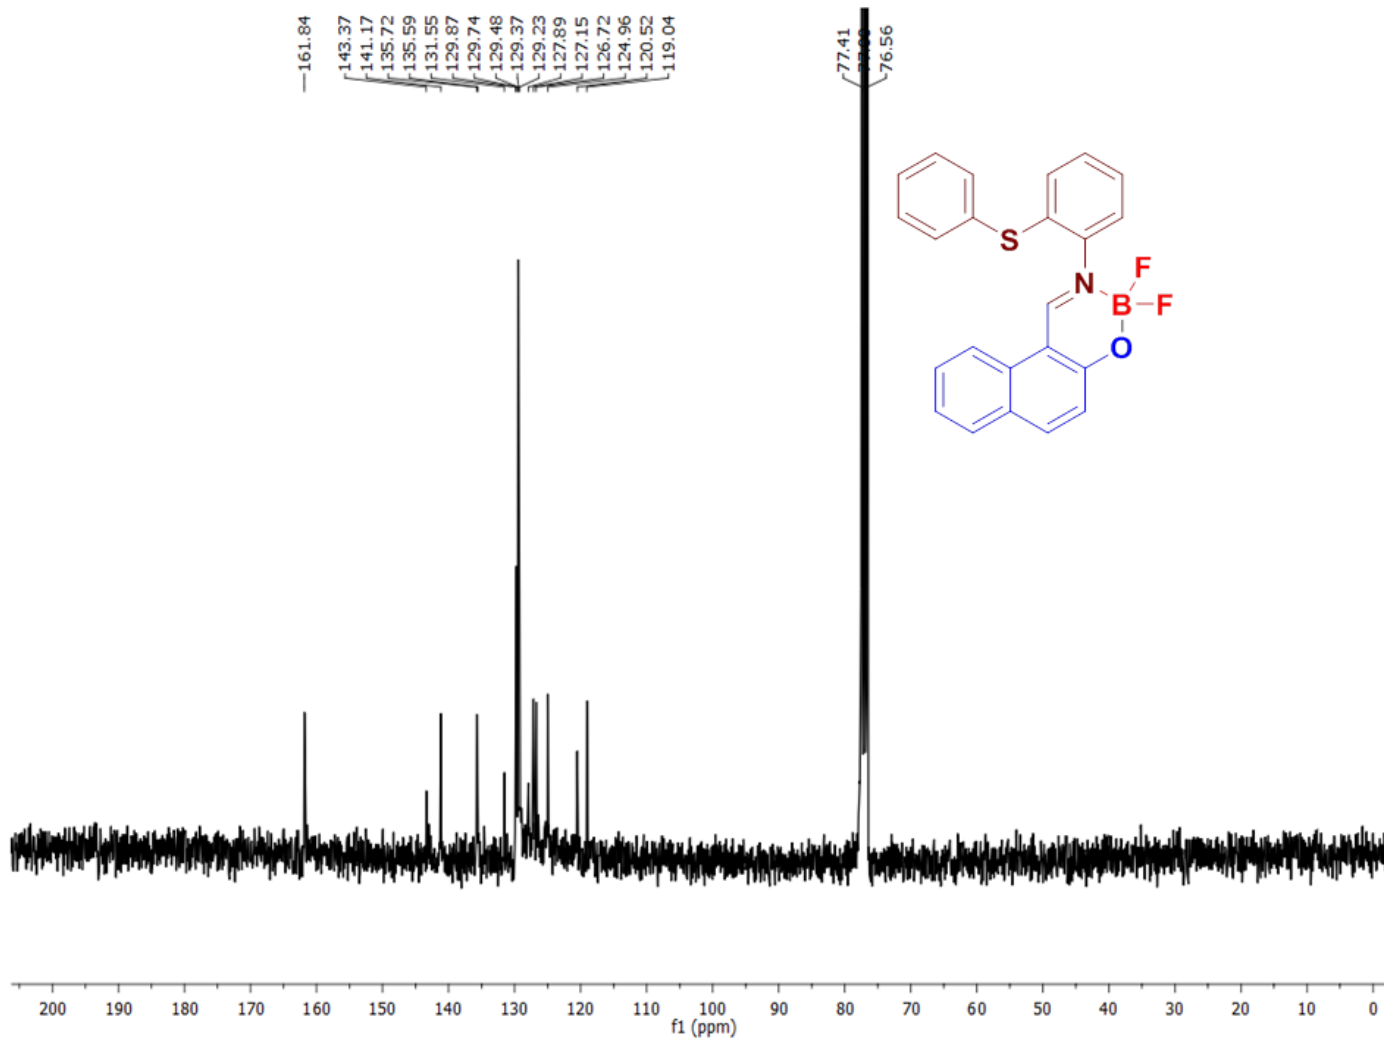

Figure S6.  $^{13}\text{C}$  NMR spectrum of compound **SB-2**



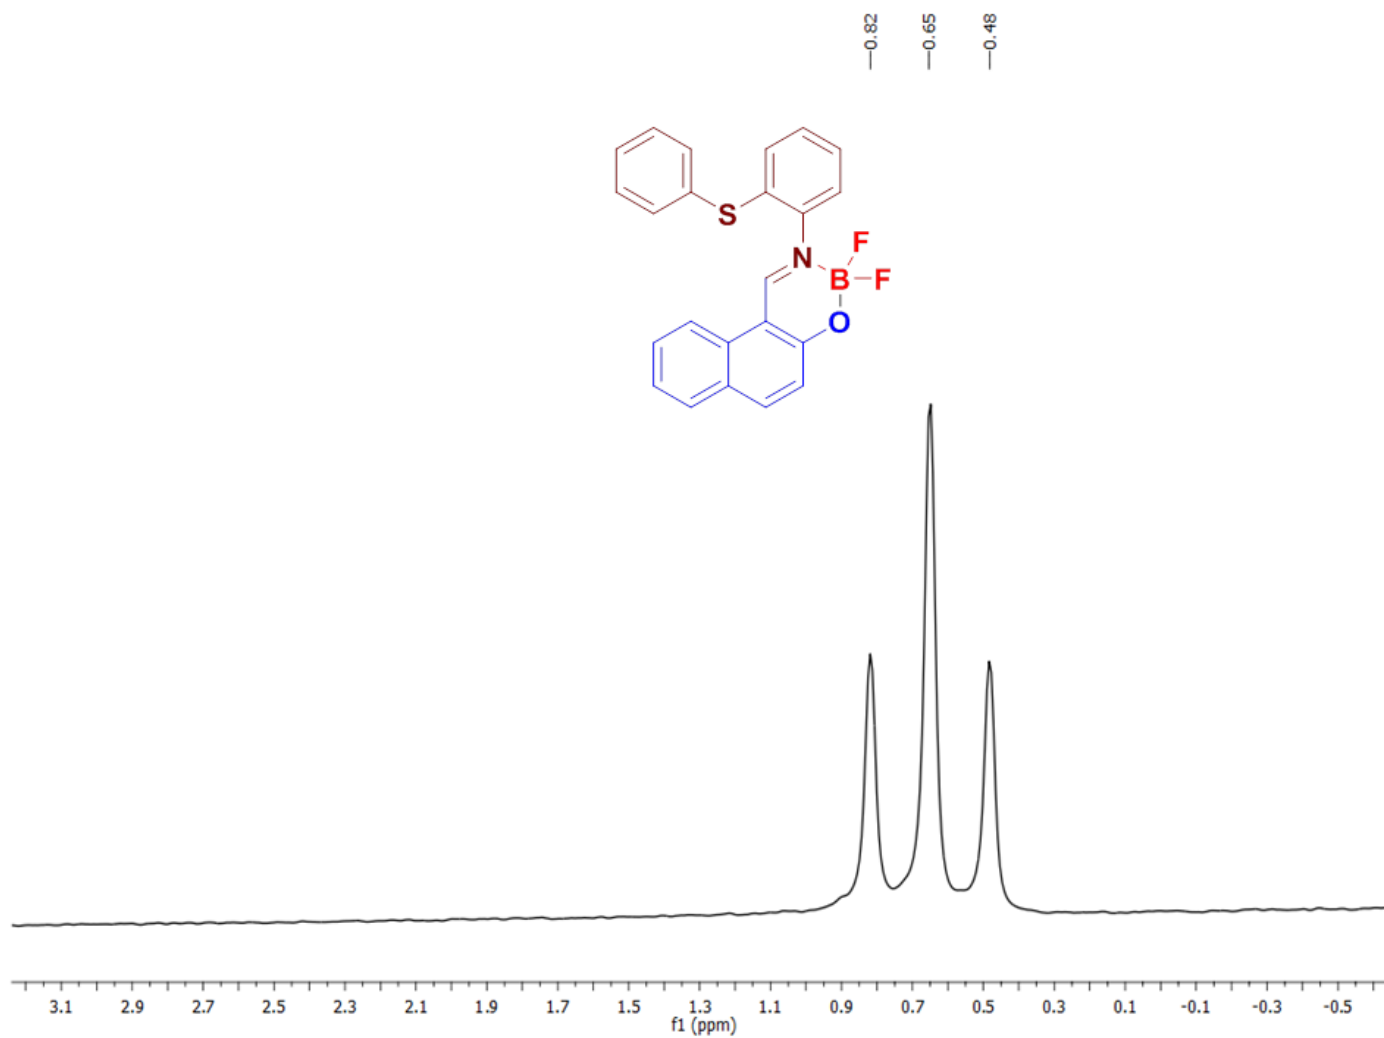

Figure S7.  $^{11}\text{B}$  NMR spectrum of compound **SB-2**

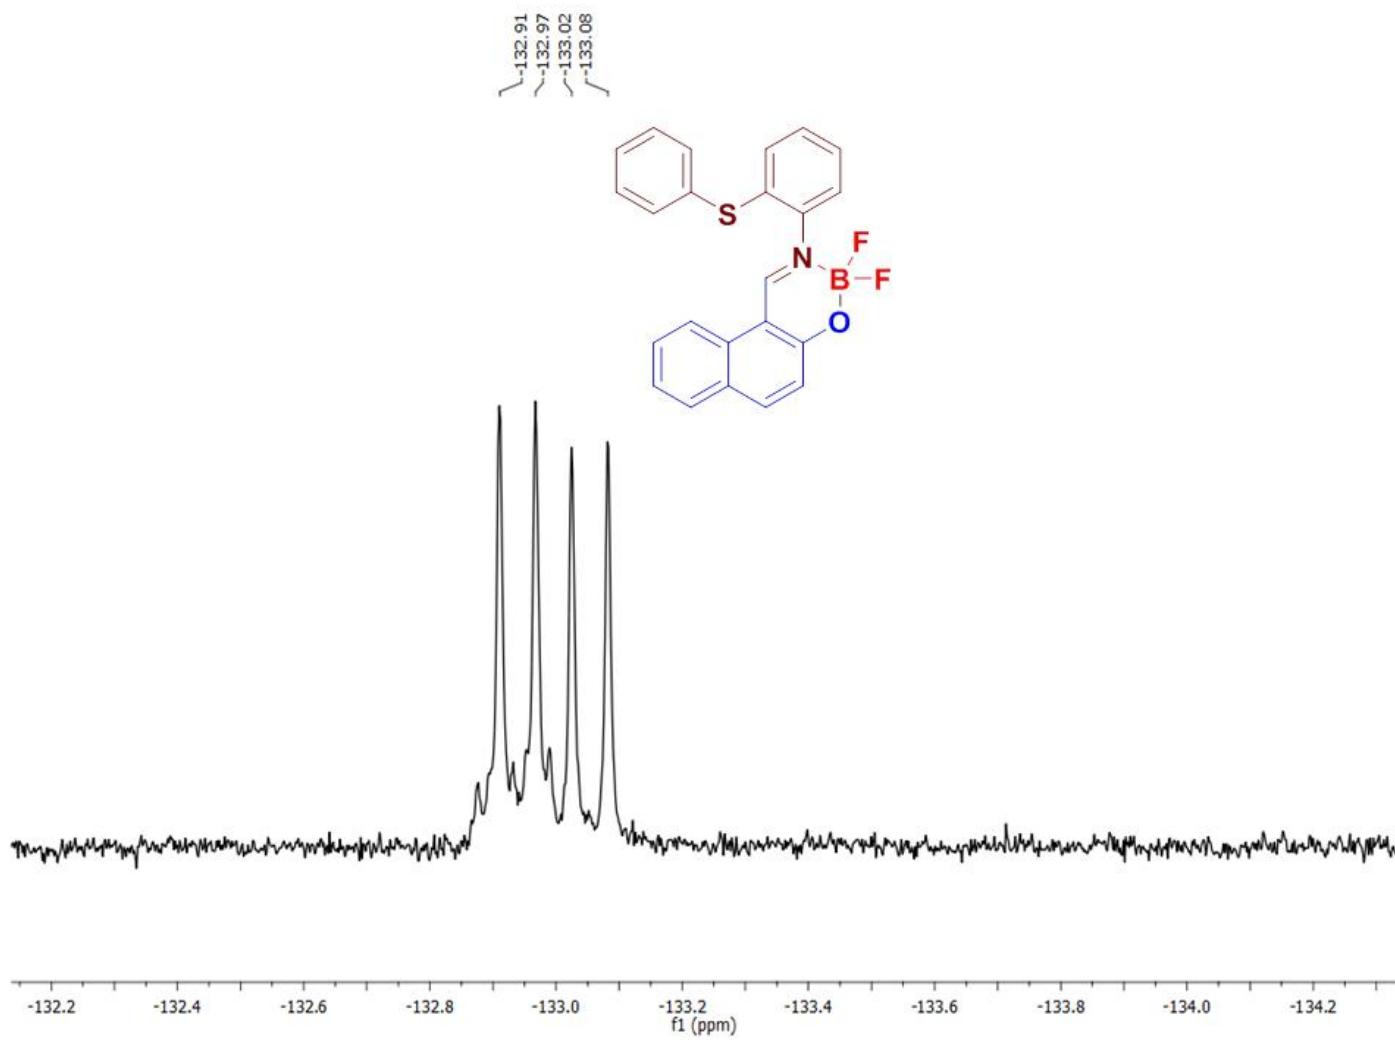

Figure S8.  $^{19}\text{F}$  NMR spectrum of compound **SB-2**

**Table S1. Selected Details about Data Collection and Crystal Refinement for boranil dyes SB-1 and SB-2**

|                        | SB-1                                                                                | SB-2                                                                                             |
|------------------------|-------------------------------------------------------------------------------------|--------------------------------------------------------------------------------------------------|
| CCDC number            | 1456040                                                                             | 1456041                                                                                          |
| Empirical formula      | C <sub>18</sub> H <sub>14</sub> BF <sub>2</sub> NOS                                 | C <sub>23</sub> H <sub>16</sub> BF <sub>2</sub> NOS                                              |
| Formula weight         | 341.17                                                                              | 403.24                                                                                           |
| Temperature            | 110.15 K                                                                            | 110.15 K                                                                                         |
| Wavelength             | 0.71073 Å                                                                           | 0.71073 Å                                                                                        |
| Crystal system         | Orthorhombic                                                                        | Monoclinic                                                                                       |
| Space group            | Pbca                                                                                | P121/c1                                                                                          |
| Unit cell dimensions   | a = 10.661(2) Å; α = 90°.<br>b = 11.234(2) Å; β = 90°.<br>c = 25.712(5) Å; γ = 90°. | a = 15.06(2) Å; α = 90°.<br>b = 11.446(16) Å; β =<br>101.569(16)°.<br>c = 10.980(16) Å; γ = 90°. |
| Volume                 | 3079.5(11) Å <sup>3</sup>                                                           | 1855(5) Å <sup>3</sup>                                                                           |
| Z                      | 8                                                                                   | 4                                                                                                |
| Density (calculated)   | 1.472 Mg/m <sup>3</sup>                                                             | 1.444 Mg/m <sup>3</sup>                                                                          |
| Absorption coefficient | 0.236 mm <sup>-1</sup>                                                              | 0.209 mm <sup>-1</sup>                                                                           |
| F(000)                 | 1408                                                                                | 832                                                                                              |
| Crystal size           | 0.38 x 0.127 x 0.104 mm <sup>3</sup>                                                | 0.522 x 0.148 x 0.074 mm <sup>3</sup>                                                            |

|                                   |                                             |                                             |
|-----------------------------------|---------------------------------------------|---------------------------------------------|
| Theta range for data collection   | 2.482 to 24.998°.                           | 2.252 to 27.550°.                           |
| Index ranges                      | -12<=h<=12, -13<=k<=13, -30<=l<=30          | -19<=h<=19, -14<=k<=14, -14<=l<=14          |
| Reflections collected             | 27275                                       | 21099                                       |
| Independent reflections           | 2721 [R(int) = 0.0895]                      | 4245 [R(int) = 0.0325]                      |
| Completeness to theta = 25.242°   | 97.8 %                                      | 99.9 %                                      |
| Absorption correction             | Semi-empirical from equivalents             | Semi-empirical from equivalents             |
| Max. and min. transmission        | 0.7456 and 0.6639                           | .7456 and 0.6822                            |
| Refinement method                 | Full-matrix least-squares on F <sup>2</sup> | Full-matrix least-squares on F <sup>2</sup> |
| Data / restraints / parameters    | 2721 / 0 / 218                              | 4245 / 0 / 262                              |
| Goodness-of-fit on F <sup>2</sup> | 1.060                                       | 1.040                                       |
| Final R indices [I>2sigma(I)]     | R1 = 0.0458, wR2 = 0.0822                   | R1 = 0.0410, wR2 = 0.0910                   |
| R indices (all data)              | R1 = 0.0675, wR2 = 0.0915                   | R1 = 0.0523, wR2 = 0.0972                   |
| Largest diff. peak and hole       | 0.277 and -0.304 e.Å <sup>-3</sup>          | 0.351 and -0.317 e.Å <sup>-3</sup>          |

---

**Figure-S9: X-ray crystal structure of compound SB-1**

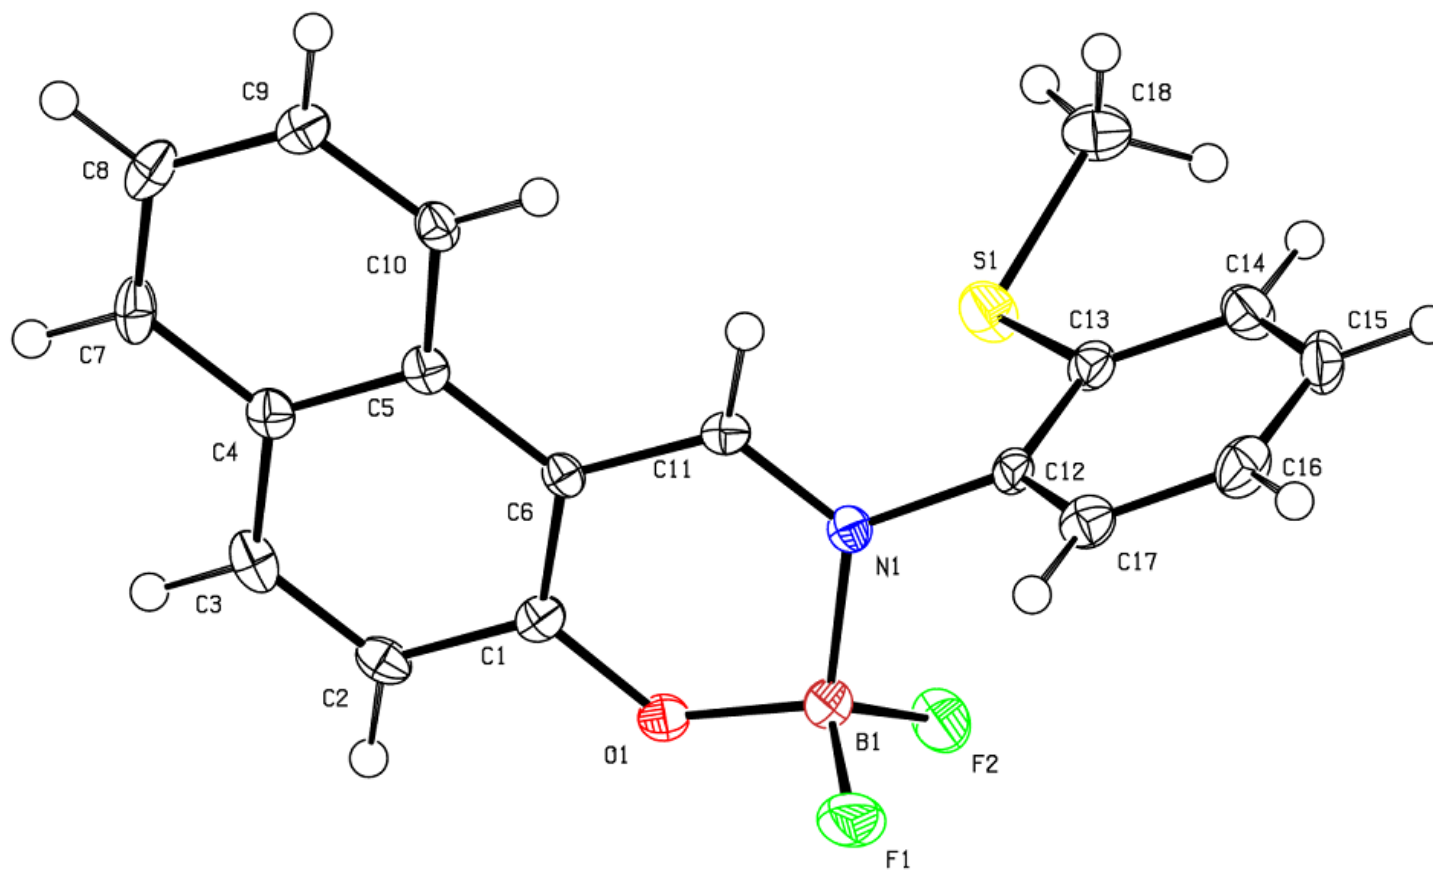

**Figure-S10: X-ray crystal structure of compound SB-2**

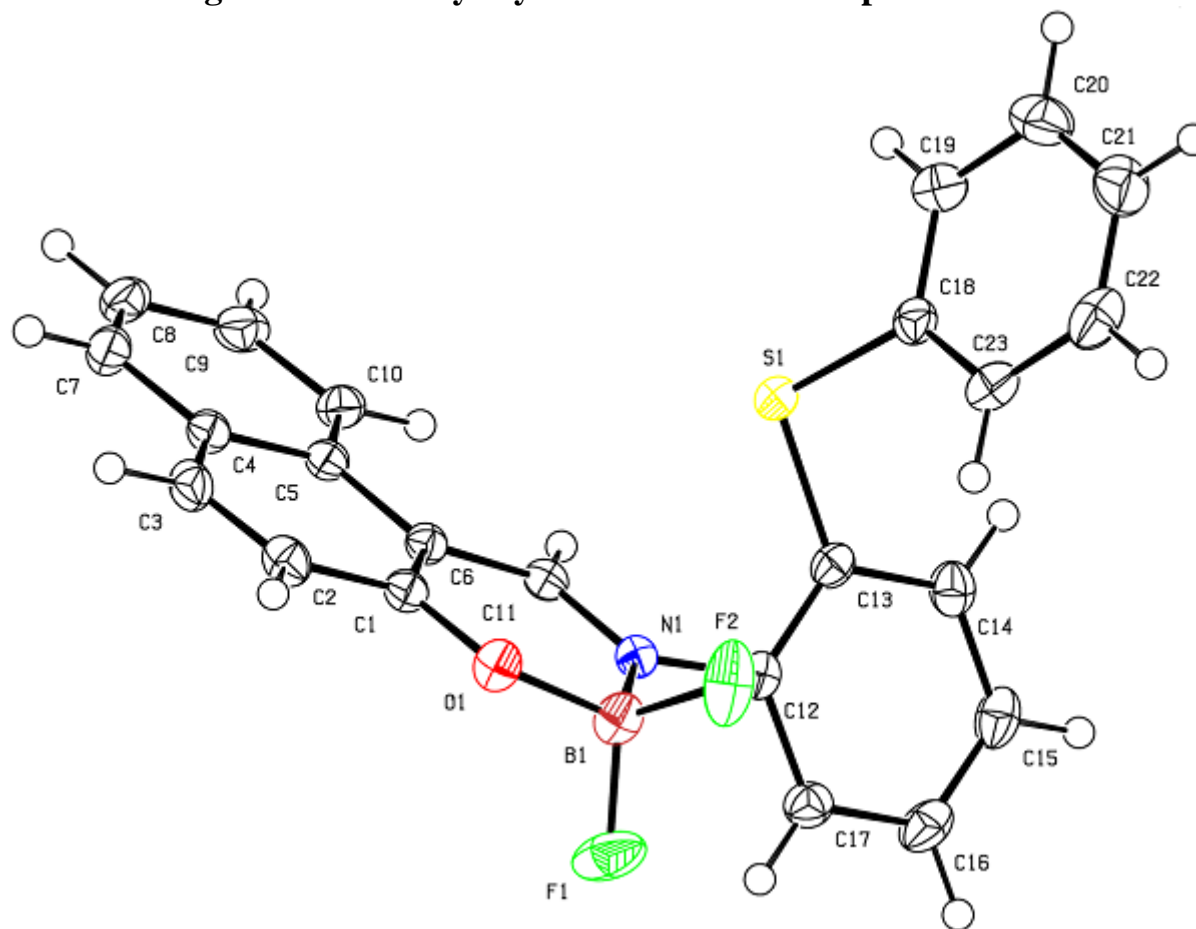

**Figure S11.** UV-Vis absorption spectra of **SB-1** (10  $\mu$ M) in 100 mM Phosphate buffer (pH 7.54) in the presence of various RNS and ROS such as NO, H<sub>2</sub>O<sub>2</sub>, ClO<sup>-</sup>, NO<sub>3</sub><sup>-</sup>, NO<sub>2</sub><sup>-</sup>, ROO<sup>-</sup>, ONOO<sup>-</sup>, O<sub>2</sub>, t-BuOOH, ascorbic acid, GSH and HO<sup>-</sup>(1mM) .

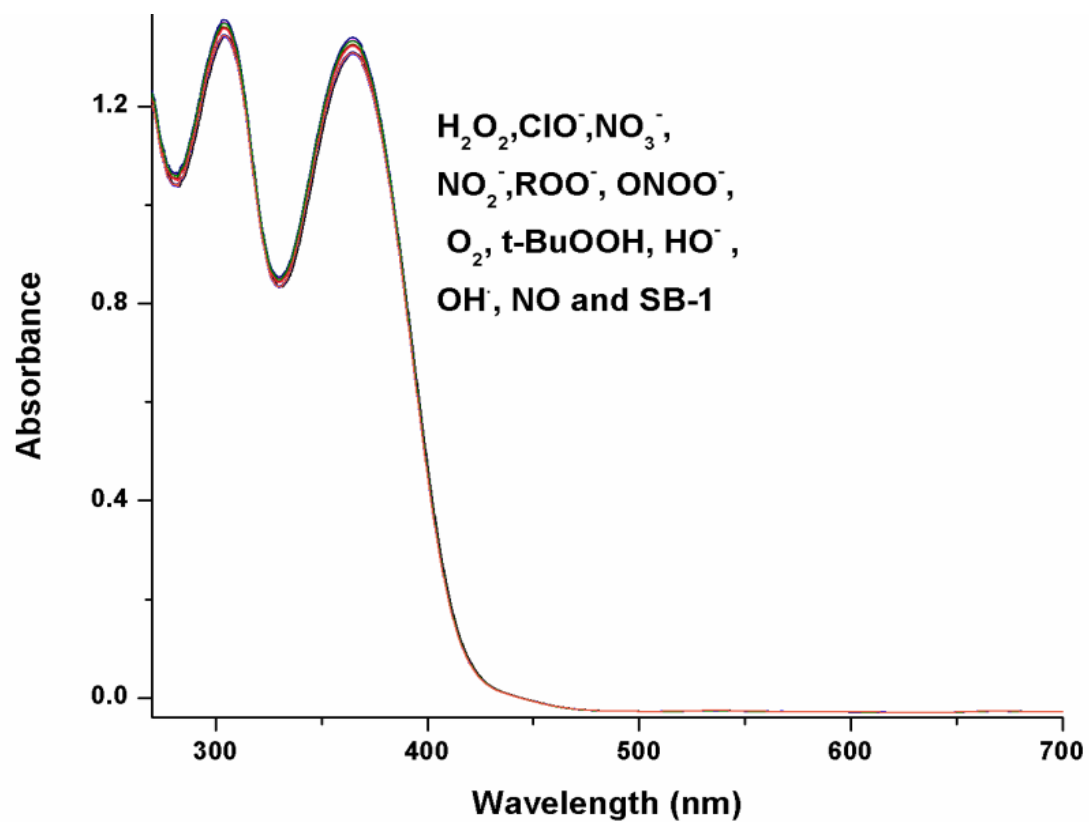

**Figure S12.** UV-Vis absorption spectra of **SB-2** (10  $\mu$ M) in 100 mM phosphate buffer (pH 7.54) in the presence of various RNS and ROS such as NO, H<sub>2</sub>O<sub>2</sub>, ClO<sup>-</sup>, NO<sub>3</sub><sup>-</sup>, NO<sub>2</sub><sup>-</sup>, ROO<sup>-</sup>, ONOO<sup>-</sup>, O<sub>2</sub>, t-BuOOH, ascorbic acid, GSH and HO<sup>-</sup> (1mM) .

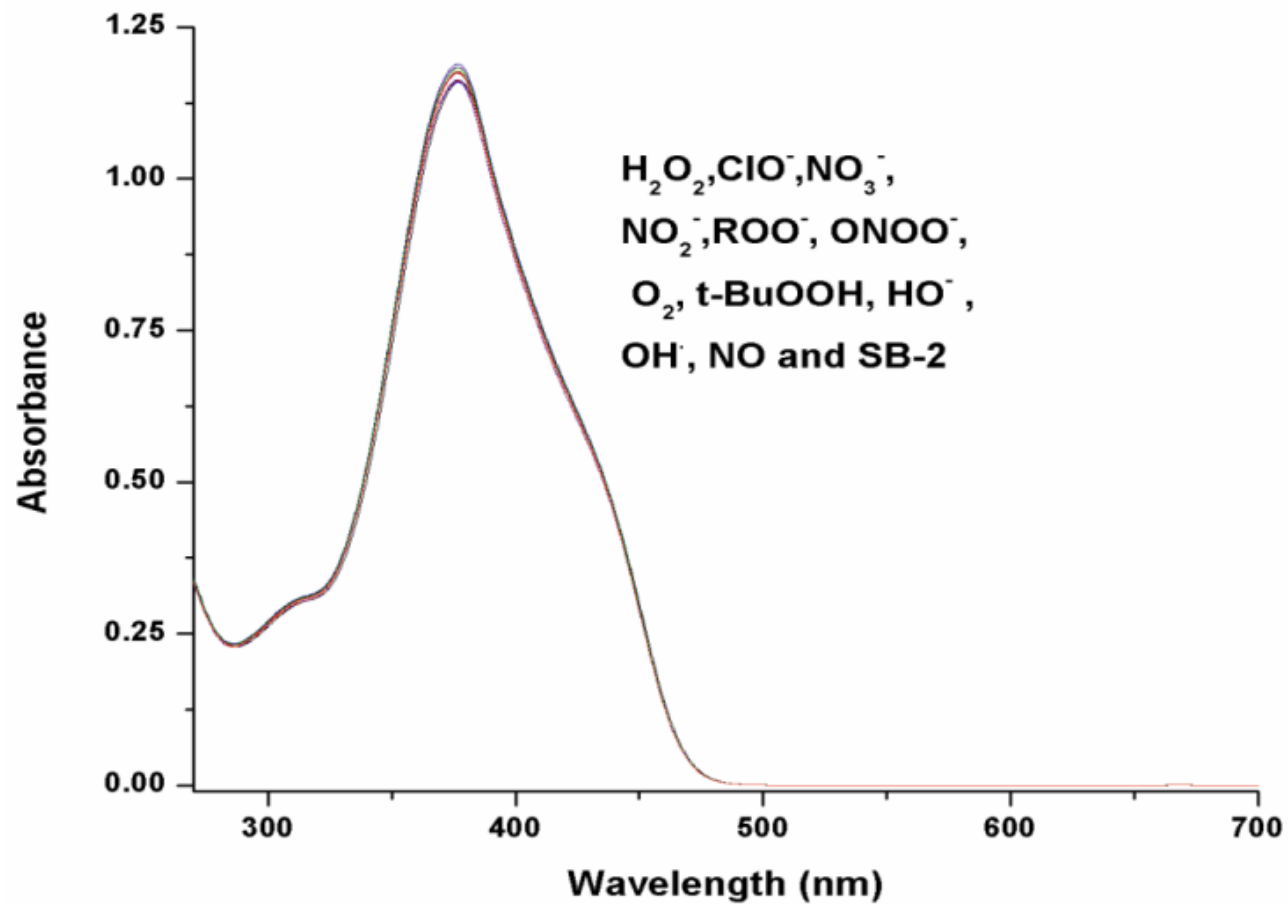



**Figure S13.** Time dependent fluorescence response of **SB-1** with  $\text{H}_2\text{O}_2$ .

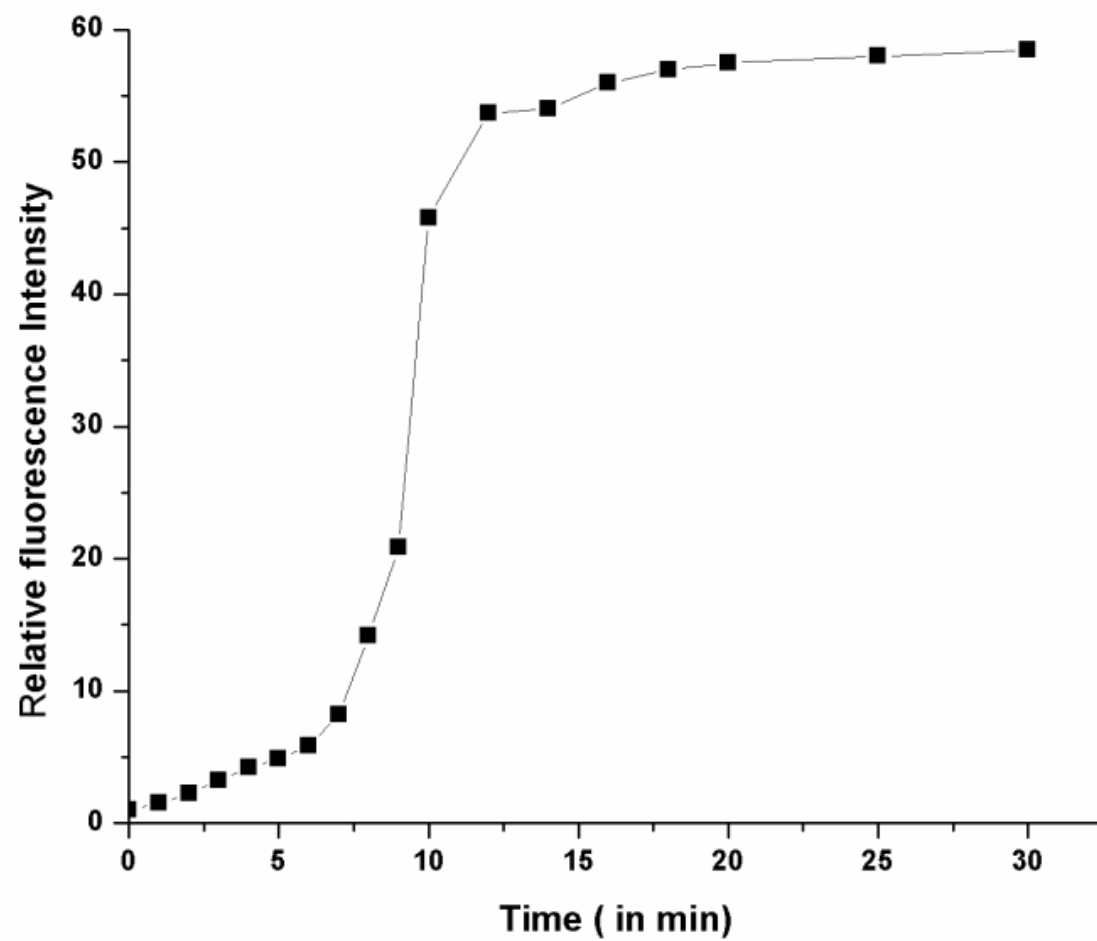

**Figure S14.** Time dependent fluorescence response of **SB-2** with  $\text{H}_2\text{O}_2$ .

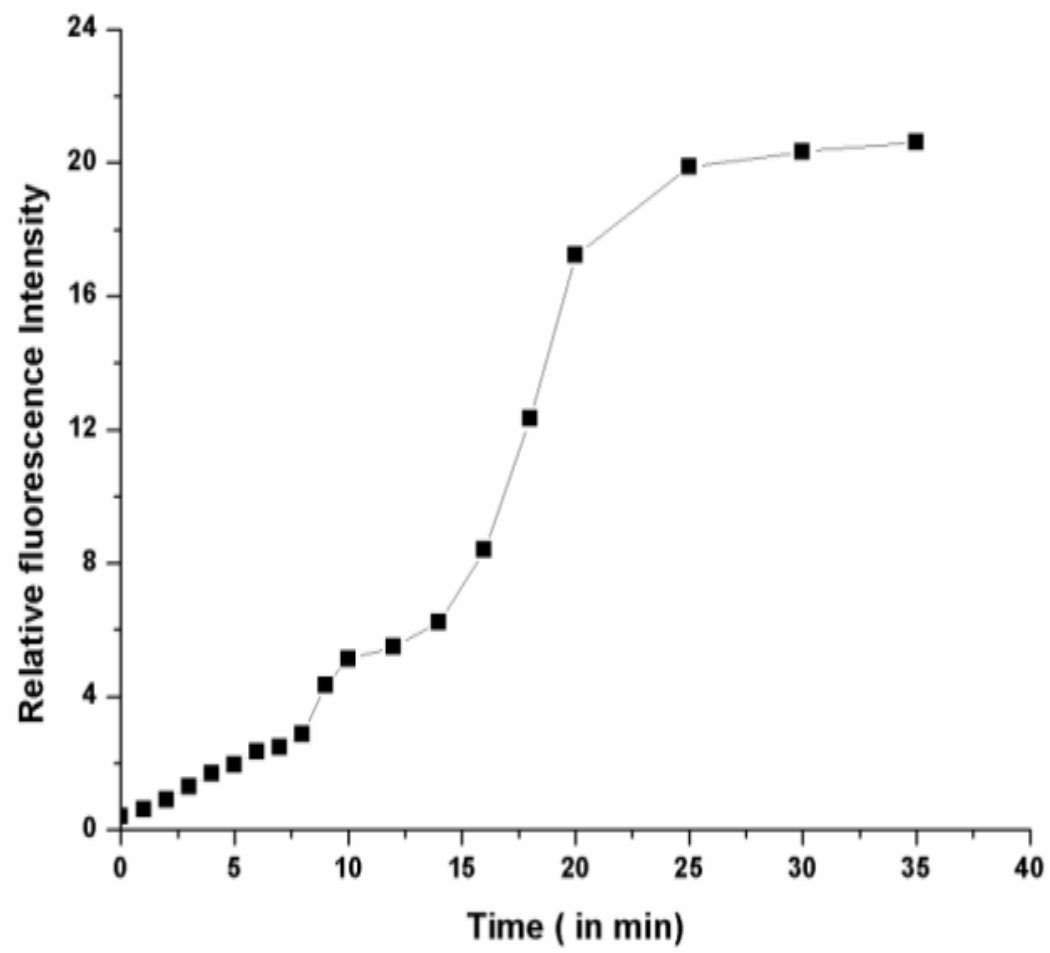

**Figure S15.** Linearity plot of change of fluorescence intensity at  $\lambda_{Emm} = 503$  vs concentration of hydrogen peroxide added to the probe **SB-1**.

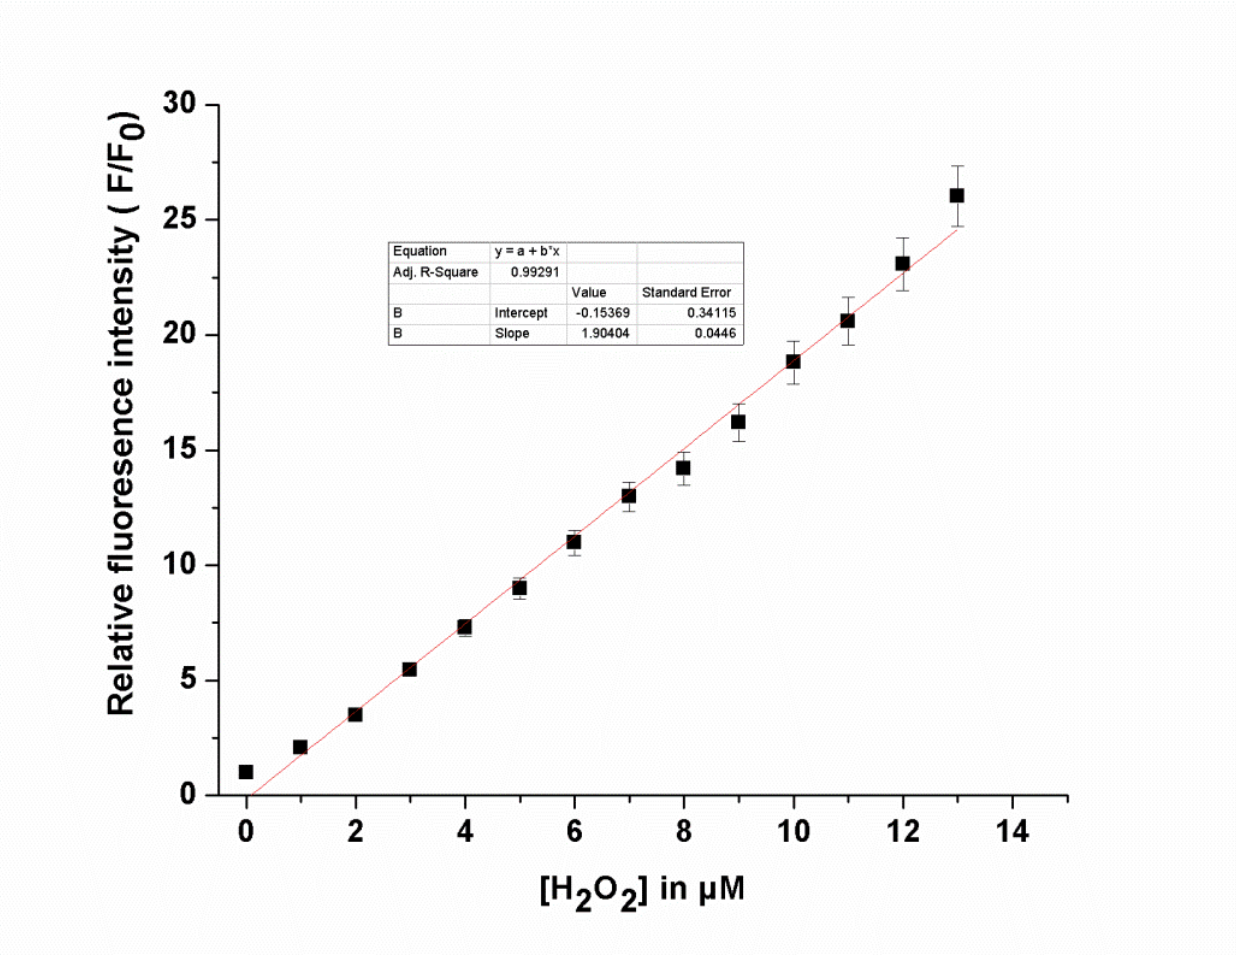

**Figure S16.** Linearity plot of change of fluorescence intensity at  $\lambda_{\text{Emm}} = 510$  vs concentration of Hydrogen peroxide added to the probe **SB-2**.

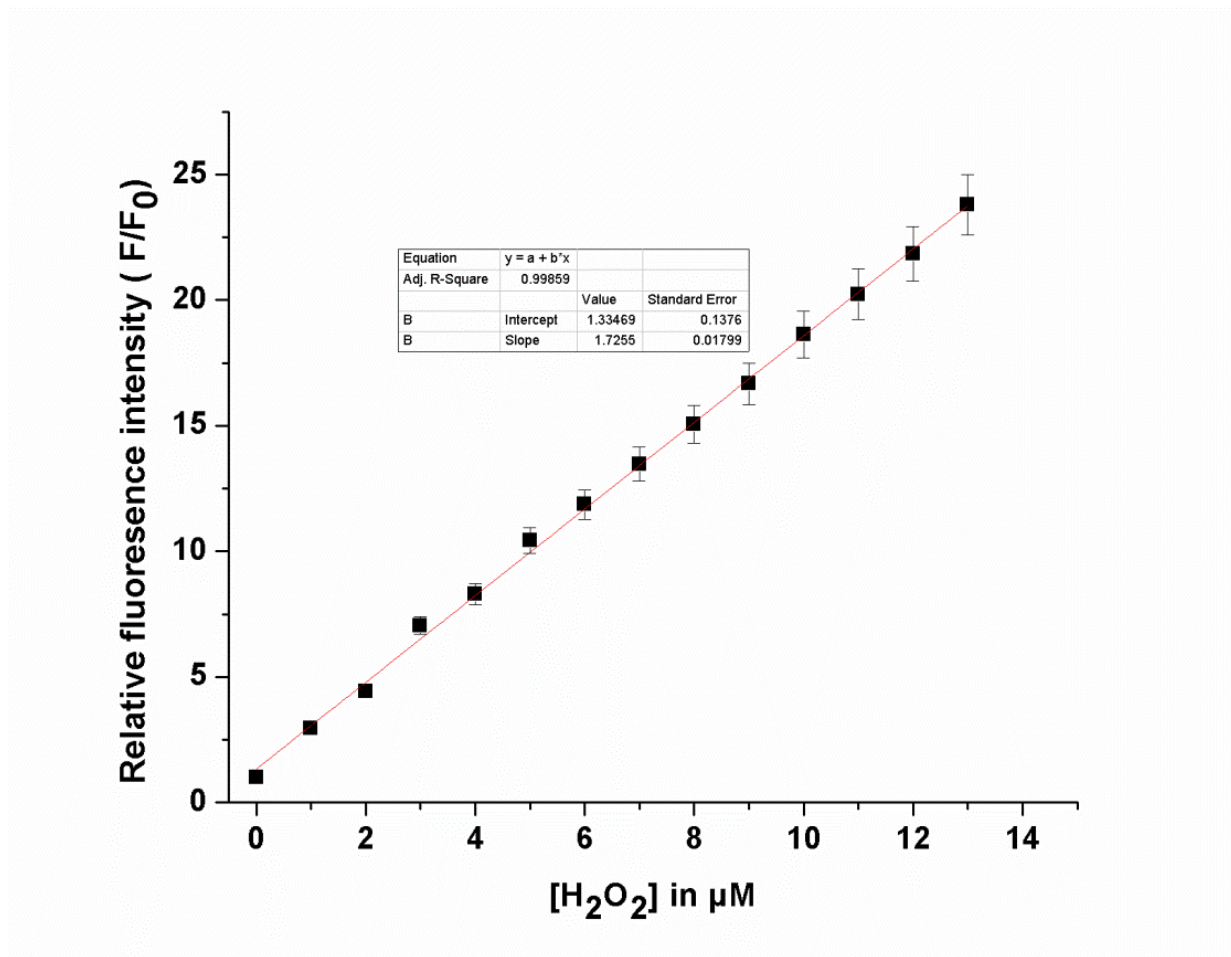

**Figure S17.** Effect of pH on the fluorescence of **SB-1** and SB-2

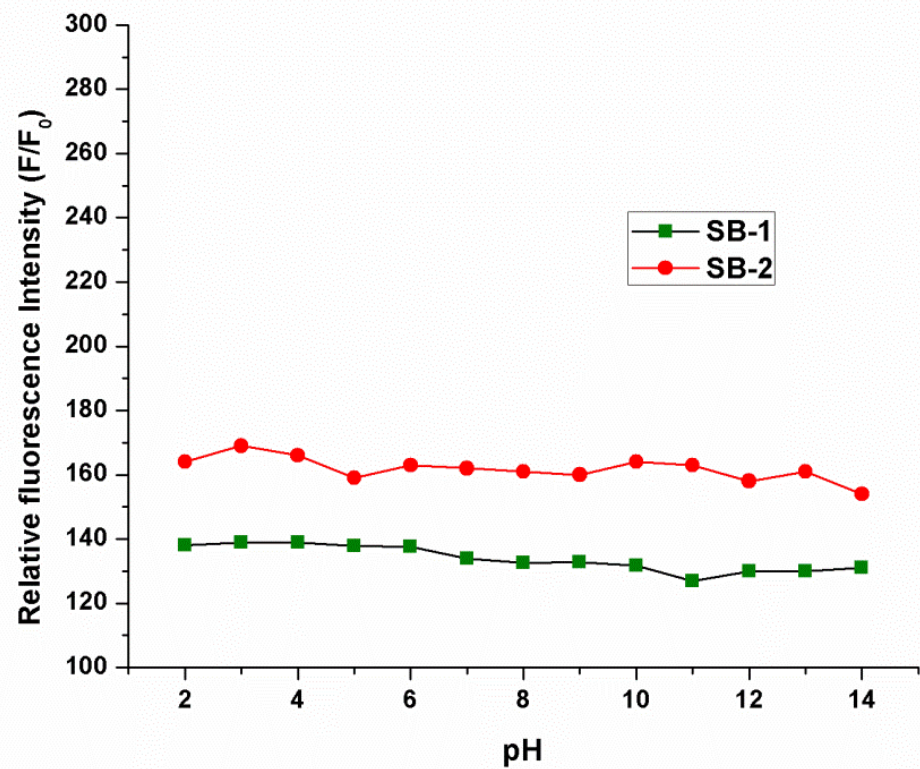

**Figure S18.** Cell viability assay- Plot of % of viable cells vs concentration of **SB-1** and **SB-2**:

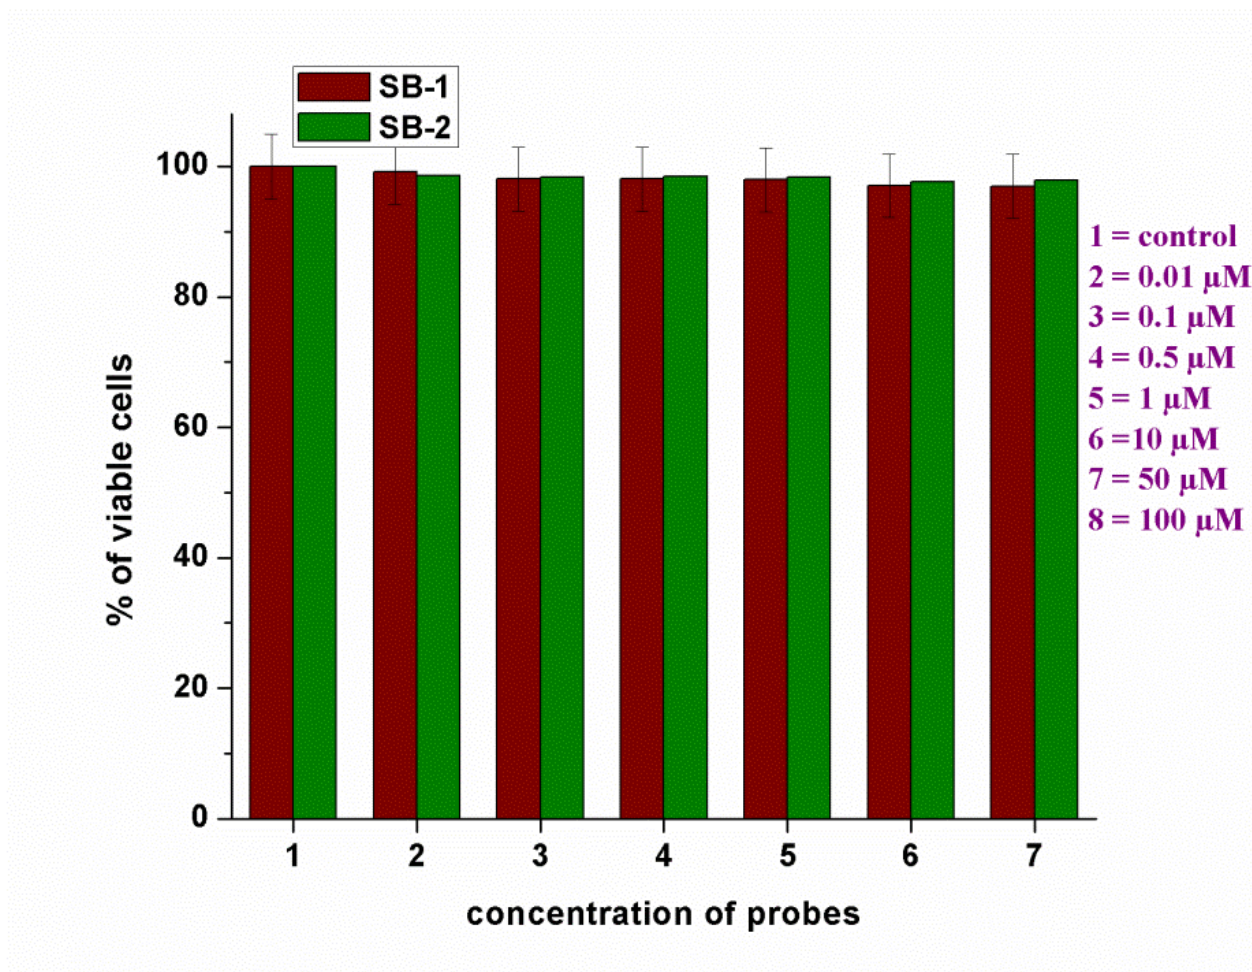

**Figure S19.** Optimized geometries of **SB-1** and **SB-2**

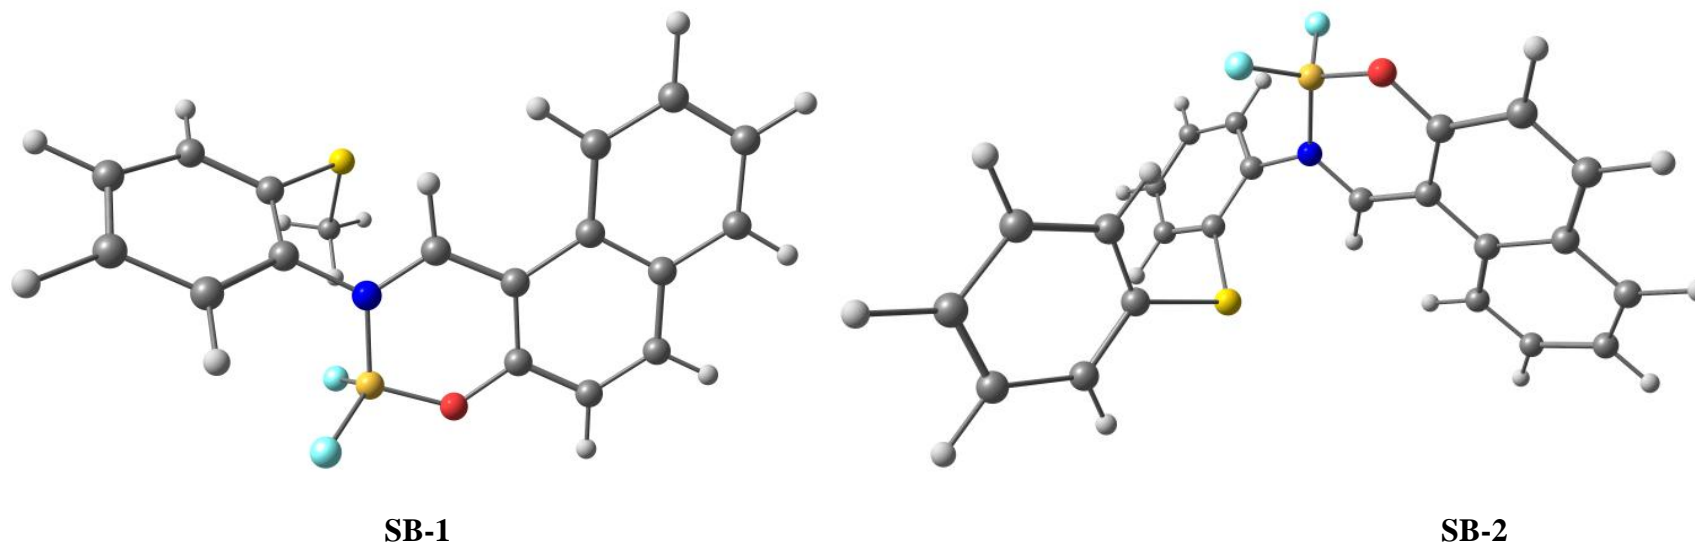

**Figure S20.** Optimized geometries of oxidized forms of **SB-1** and **SB-2**

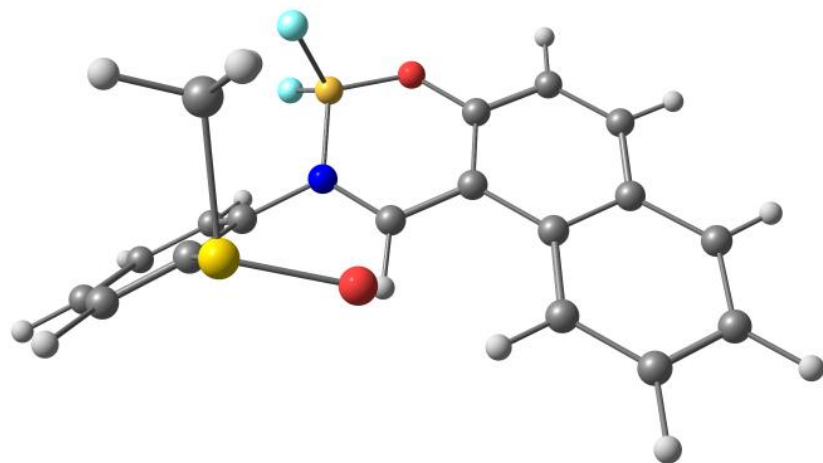

**Oxidized form of SB-1**

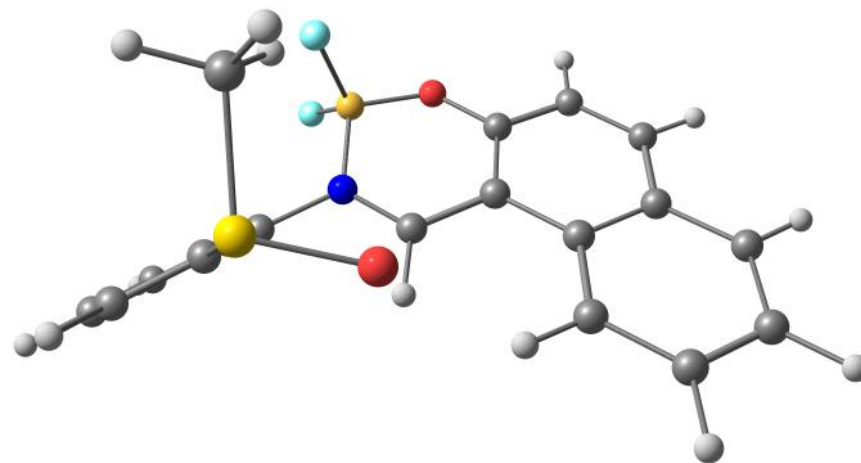

**Oxidized form of SB-2**



**Table S2: The comparison of the present H<sub>2</sub>O<sub>2</sub> detection methods with the existing methods.**

| <i>Boron based Probe</i>                         | <i>Emission Maximum<br/>(<math>\lambda</math> in nm)</i> | <i>Turn on/off<br/>(fluorescence)</i> | <i>Detection limit</i> | <i>Ref</i>      |
|--------------------------------------------------|----------------------------------------------------------|---------------------------------------|------------------------|-----------------|
| Peroxy Lucifer                                   | 475                                                      | ON                                    | Ratiometric            | 1               |
| Cyaninefluorochrome                              | 715                                                      | ON                                    | 1 $\mu$ M              | 2               |
| Mitochondria peroxy yellow 1                     | 540                                                      | ON                                    | NA                     | 3               |
| Ratio-Peroxyfluor-1                              | 464                                                      | NA                                    | Ratiometric            | 4               |
| Prototype probe                                  | 440                                                      | NA                                    | 0.1 ~ 5 $\mu$ M        | 5               |
| MitoBoronic acid                                 | NA                                                       | NA                                    | 1 $\mu$ M              | 6               |
| Tetraphenylethylene-Borolane<br>(TPE-BO)         | 500                                                      | ON                                    | 0.52 $\mu$ M           | 7               |
| Naphthalimide fluorophore                        | 528                                                      | ON                                    | NA                     | 8               |
| Carbazole-Quinoline cationic<br>based            | 527                                                      | ON                                    | 0.04 $\mu$ M           | 9               |
| <i>meso</i> -(4-pyridinyl)-substituted<br>BODIPY | 520                                                      | ON                                    | 0.1 - 40 $\mu$ M       | 10              |
| Boranil Dye <b>SB-1/SB-2</b>                     | 503/510                                                  | ON                                    | 70.27 nM<br>/31.27 nM  | Present<br>work |

*NA = Not available*

**References:**

1. D. Srikun, E. W. Miller, D. W. Domaille, and C. J. Chang, *J. Am. Chem. Soc.*, 2008, **130**, 4596.
2. N. K. Lifshin, E. Segal, L. Omer, M. Portnoy, R. S. Fainaro, and D. Shabat, *J. Am. Chem. Soc.*, 2011, **133**, 10960.
3. B. C. Dickinson and C. J. Chang, *J. Am. Chem. Soc.* 2008, **130**, 9638.
4. A. E. Albers, V. S. Okreglak and C. J. Chang, *J. Am. Chem. Soc.*, 2006, **128**, 9640.
5. L. -C. Lo and C. -Y Chu, *Chem. Commun.*, 2003, 2728.
6. H. M. Cochemé, A. Logan, T. A. Prime, I. Abakumova, C. Quin, S. J. McQuaker, J. V. Patel, I. M. Fearnley, A. M James, C. M. Porteous, R. A. J. Smith, R. C. Hartley, L. Partridge, and M. P. Murphy, *Nat. Protoc.*, 2012, 7, 946.
7. W. Zhang, W. Liu, P. Li, F. Huang, H. Wang and B. Tang. *Anal. Chem.* 2015, **87**, 9825.
8. D. Kim, G. Kim, S. -J. Nam, J. Yin and J. Yoon, *Sci. Rep.*, 2015, **5**, 8488.
9. J. Xu, Y. Zhang, H. Yu, X. Gao and S. Shao, *Anal. Chem.*, 2016, **88**, 1455.
10. J. Xu, Q. Li, Y. Yue, Y. Guo, S. Shao, *Biosens. Bioelectron.*, 2014, **56**, 58.
